# Supplementary material
Source: ML conference proceedings conference paper supplement (https://proceedings.mlr.press/v222/lemaire24a.html)
Supplement: Supplementary file 1 [file lemaire24a-supp.pdf]

# Supplementary Material for SANGEA: Scalable and Attributed Network Generation

Valentin Lemaire<sup>1</sup>  
 Youssef Achenchabe<sup>2</sup>  
 Lucas Ody<sup>1</sup>  
 Housseem Eddine Souid<sup>3</sup>  
 Gianmarco Aversano<sup>1</sup>  
 Nicolas Posocco<sup>1</sup>  
 Sabri Skhiri<sup>1</sup>

VALENTIN.LEMAIRE@EURANOVA.EU  
 YOUSSEF.ACHENCHABE@EURANOVA.EU  
 LUCAS.ODY@EURANOVA.EU  
 HOUSSEM.SOUID@EURANOVA.EU  
 GIANMARCO.AVERSANO@EURANOVA.EU  
 NICOLAS.POSOCCO@EURANOVA.EU  
 SABRI.SKHIRI@EURANOVA.EU

<sup>1</sup> *Euranova, Rue Emile Francqui 4, 1435 Mont-Saint-Guibert, Belgium.*

<sup>2</sup> *Euranova, 146 Rue Paradis, 13006 Marseille, France.*

<sup>3</sup> *Euranova, 6 Les Berges du Lac 3, Tunis 2015, Tunisia.*

**Editors:** Berrin Yanıkoğlu and Wray Buntine

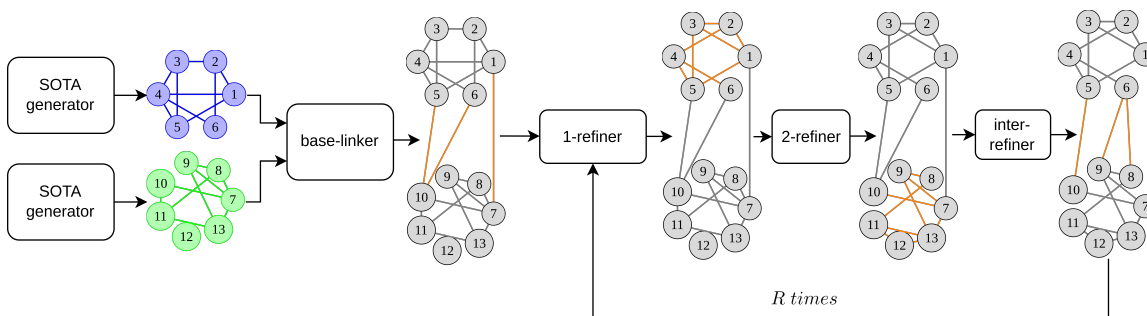

Figure 1: Full generation procedure of the SANGEA method

**Parallelization of the Training Phases** The training process is composed of independent steps that can be carried out in parallel: community partitioning is a prerequisite of all other phases and must be run as the first phase; phases 2 to 4 are independent and can be run in parallel: The base linker only uses information from the original graph and its partition to train the link predictor, and the same holds for the base refiner. Only phase 5 depends on the result of phase 4. Because in phase 5 the base refiner is copied to perform further training, phase 4 must be completed before phase 5 can start. However, we are fine-tuning  $C + 1$  models in phase 5. Each of those is independent of the others so they can all be trained in parallel.

## 1. Process time

### 1.1. SANGEA

Table 1 reports results on the execution time per epoch of the different parts of our *SANGEA* algorithm on four datasets of an increasing number of nodes and edges.

|        | Process time at training [s] |             |              |              | Process time at generation [s] |                 |
|--------|------------------------------|-------------|--------------|--------------|--------------------------------|-----------------|
|        | Init                         | Base linker | Base refiner | $k$ -refiner | Base linking                   | Refinement step |
| Cora   | 3.25                         | 1.12        | 1.92         | 0.81         | 2.14                           | 0.74            |
| IMDB   | 14.52                        | 2.51        | 1.73         | 1.43         | 44.86                          | 2.91            |
| Amazon | 134.13                       | 12.06       | 37.97        | 3.59         | 28.48                          | 6.02            |
| Flickr | 1286.15                      | 19.24       | 219.87       | 5.46         | 954.35                         | 224.75          |

Table 1: *SANGEA*'s execution time on increasing graph size. Training times reported in *sec/epoch* except for Init time which happens only once.

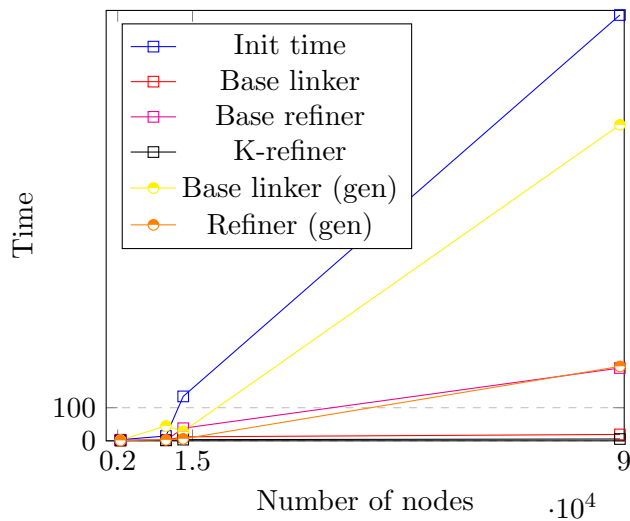

Figure 2: *SANGEA*'s execution times per number of nodes

## 1.2. State-of-the-art approaches

|          | Process time [s] |                |                 |
|----------|------------------|----------------|-----------------|
|          | Init time        | Time per epoch | Generation time |
| NVDiff   | 2.52             | 0.60           | 2.56            |
| GDSS     | 0.01             | 1.73           | 62.59           |
| GVAEmm   | 2.70             | 0.47           | 0.03            |
| GraphGen | 5.85             | 0.92           | 2.39            |
| BiGG     | 1.97             | 0.61           | 0.54            |

Table 2: Execution time on a subgraph from Cora (175 nodes 281 edges)

|          | Process time [s] |                |                 |
|----------|------------------|----------------|-----------------|
|          | Init time        | Time per epoch | Generation time |
| NVDiff   | OOM              | OOM            | OOM             |
| GDSS     | OOM              | OOM            | OOM             |
| GVAEmm   | OOM              | OOM            | OOM             |
| GraphGen | 10186            | 2.45           | 49.22           |
| BiGG     | 2.23             | 1.09           | 91.19           |

Table 3: Execution time of state-of-the-art approaches on Cora

|          | Process time [s] |                |                 |
|----------|------------------|----------------|-----------------|
|          | Init time        | Time per epoch | Generation time |
| NVDiff   | OOM              | OOM            | OOM             |
| GDSS     | OOM              | OOM            | OOM             |
| GVAEmm   | OOM              | OOM            | OOM             |
| GraphGen | OOM              | OOM            | OOM             |
| BiGG     | OOM              | OOM            | OOM             |

Table 4: Execution time on Amazon Computers

|          | Process time [s] |                |                 |
|----------|------------------|----------------|-----------------|
|          | Init time        | Time per epoch | Generation time |
| NVDiff   | OOM              | OOM            | OOM             |
| GDSS     | OOM              | OOM            | OOM             |
| GVAEmm   | OOM              | OOM            | OOM             |
| GraphGen | 32538.84         | 5.81           | 161.17          |
| BiGG     | 2.06             | 1.75           | 173.58          |

Table 5: Execution time on IMDB

|          | Process time [s] |                |                 |
|----------|------------------|----------------|-----------------|
|          | Init time        | Time per epoch | Generation time |
| NVDiff   | OOM              | OOM            | OOM             |
| GDSS     | OOM              | OOM            | OOM             |
| GVAEmm   | OOM              | OOM            | OOM             |
| GraphGen | Timeout          | Timeout        | Timeout         |
| BiGG     | OOM              | OOM            | OOM             |

Table 6: Execution time on Flickr

## 2. Generation quality

|                   | Competitors     |         |             | Ours           |                 |                            |
|-------------------|-----------------|---------|-------------|----------------|-----------------|----------------------------|
|                   | GraphGen        | BiGG    | Other SOTAs | SANGEA (GDSS)  | SANGEA (GVAEmm) | SANGEA (GraphGen) (NVDiff) |
| MMD (gcn tr.)     | -               | -       | -           | <b>0</b>       | -               | <b>0</b>                   |
| MMD (gcn unt.)    | -               | -       | -           | <b>0</b>       | -               | 0.15                       |
| WS spectral       | <b>1.45e-4</b>  | 26e-4   |             | 40e-4          | 36.2e-4         | 3.28e-4                    |
| WS deg. hist.     | <b>3.52e-4</b>  | 28.3e-4 |             | 126e-4         | 11.4e-4         | 5.97e-4                    |
| WS deg. centr.    | 3.35e-6         | 20.4e-6 | OOM         | <b>1.33e-6</b> | 133e-6          | 9.21e-6                    |
| WS clos. centr.   | <b>4.56e-6</b>  | 141e-6  |             | 25.6e-6        | 95.7e-6         | 29.38e-6                   |
| WS eigenv. centr. | <b>21.03e-6</b> | 137e-6  |             | 230e-6         | 70e-6           | 166.38e-6                  |
| WS clust. coeff.  | <b>0.95e-4</b>  | 3.64e-4 |             | 17.2e-4        | 5.2e-4          | 1.82e-4                    |
| AUROC (LP)        | 0.74            | 0.77    |             | <b>0.90</b>    | 0.74            | 0.73                       |
|                   |                 |         |             |                |                 | <b>0.90</b>                |

Table 7: Structural and attribute similarity results on CiteSeer

|                   | Competitors    |         |             | Ours          |                 |                            |
|-------------------|----------------|---------|-------------|---------------|-----------------|----------------------------|
|                   | GraphGen       | BiGG    | Other SOTAs | SANGEA (GDSS) | SANGEA (GVAEmm) | SANGEA (GraphGen) (NVDiff) |
| MMD (gcn tr.)     | -              | -       | -           | 8.97e-1       | -               | <b>0.96e-1</b>             |
| MMD (gcn unt.)    | -              | -       | -           | 9.3e-1        | -               | <b>4.9e-1</b>              |
| WS spectral       | <b>1.61e-4</b> | 18.5e-4 |             | 46e-4         | 41.5e-4         | 4.07e-4                    |
| WS deg. hist.     | <b>2.06e-4</b> | 14.3e-4 |             | 75e-4         | 10.4e-4         | 5.65e-4                    |
| WS deg. centr.    | <b>2.92e-6</b> | 5.36e-6 | OOM         | 35e-6         | 31.7e-6         | 13.33e-6                   |
| WS clos. centr.   | <b>4.74e-6</b> | 48e-6   |             | 21e-6         | 47.5e-6         | 28.13e-6                   |
| WS eigenv. centr. | <b>3.1e-5</b>  | 22.7e-5 |             | 18.3e-5       | 17e-5           | 24.97e-5                   |
| WS clust. coeff.  | <b>0.76e-4</b> | 9.25e-4 |             | 14.1e-4       | 8.1e-4          | 2.4e-4                     |
| AUROC (LP)        | 0.78           | 0.79    |             | <b>0.93</b>   | 0.78            | 0.76                       |
|                   |                |         |             |               |                 | 0.74                       |

Table 8: Structural and attribute similarity results on Cora. SANGEA(GDSS) stands for SANGEA using GDSS as a community generator.

|                  | Sa(GDSS)         |                | Sa(NVDiff)       |                |
|------------------|------------------|----------------|------------------|----------------|
|                  | <i>w.o. ref.</i> | <i>w. ref.</i> | <i>w.o. ref.</i> | <i>w. ref.</i> |
| MMD (gcn tr.)    | 23.4e-1          | <b>8.97e-1</b> | 13.7e-2          | <b>9.6e-2</b>  |
| MMD (gcn untr.)  | 21.7e-1          | <b>9.27e-1</b> | 17.9e-1          | <b>4.9e-1</b>  |
| WS spectral      | <b>46.1e-4</b>   | <b>46.1e-4</b> | 11.e-4           | <b>5.22e-4</b> |
| WS deg. hist.    | 7.64e-3          | <b>7.48e-3</b> | 17.6e-3          | <b>1.46e-3</b> |
| WS deg. cent.    | 5.49e-5          | <b>3.50e-5</b> | 9.25e-5          | <b>6.66e-5</b> |
| WS clos. cent.   | 121e-6           | <b>21e-6</b>   | 10.6e-5          | <b>9.10e-5</b> |
| WS eigenv. cent. | 15.5e-4          | <b>1.83e-4</b> | 13.1e-4          | <b>3.88e-4</b> |
| WS clust. coeff. | 1.67e-3          | <b>1.41e-3</b> | 35.8e-4          | <b>4.64e-4</b> |
| AUROC (LP)       | 0.54             | <b>0.93</b>    | 0.71             | <b>0.74</b>    |

Table 9: Ablation study of the refinement process for the Cora dataset

|                  | Sa(GDSS)         |                | Sa(NVDiff)       |                |
|------------------|------------------|----------------|------------------|----------------|
|                  | <i>w.o. ref.</i> | <i>w. ref.</i> | <i>w.o. ref.</i> | <i>w. ref.</i> |
| MMD (gcn tr.)    | 2.72e-3          | <b>0.00</b>    | 0.08             | <b>0.00</b>    |
| MMD (gcn untr.)  | 8.82e-4          | <b>0.00</b>    | 0.37             | <b>0.15</b>    |
| WS spectral      | <b>2.20e-3</b>   | 4.00e-3        | 4.87e-3          | <b>1.36e-3</b> |
| WS deg. hist.    | 3.09e-2          | <b>1.26e-2</b> | 11.5e-3          | <b>1.81e-3</b> |
| WS deg. cent.    | 192e-6           | <b>1.33e-6</b> | 1.34e-4          | <b>1.32e-4</b> |
| WS clos. cent.   | 8.83e-5          | <b>2.56e-5</b> | <b>1.00e-5</b>   | 17.9e-5        |
| WS eigenv. cent. | 9.30e-4          | <b>2.30e-4</b> | <b>1.40e-4</b>   | 2.12e-4        |
| WS clust. coeff. | 3.29e-3          | <b>1.72e-3</b> | 12.4e-4          | <b>2.91e-4</b> |
| AUROC (LP)       | 0.63             | <b>0.90</b>    | 0.84             | <b>0.90</b>    |

Table 10: Ablation study of the refinement process for the CiteSeer dataset

|                  | Sa(GDSS)         |                | Sa(NVDiff)       |                |
|------------------|------------------|----------------|------------------|----------------|
|                  | <i>w.o. ref.</i> | <i>w. ref.</i> | <i>w.o. ref.</i> | <i>w. ref.</i> |
| MMD (gcn tr.)    | 0.438            | <b>0.305</b>   | 0.489            | <b>0.379</b>   |
| MMD (gcn untr.)  | 0.0631           | <b>0.00210</b> | 0.251            | <b>0.0713</b>  |
| WS spectral      | 43.2e-3          | <b>5.66e-3</b> | 9.78e-3          | <b>3.50e-3</b> |
| WS deg. hist.    | 41.4e-4          | <b>8.58e-4</b> | 3.00e-3          | <b>1.82e-3</b> |
| WS deg. cent.    | <b>1.05e-5</b>   | <b>1.05e-5</b> | 5.40e-5          | <b>5.40e-5</b> |
| WS clos. cent.   | 26.2e-6          | <b>2.84e-6</b> | 6.17e-5          | <b>1.00e-5</b> |
| WS eigenv. cent. | 31.2e-5          | <b>4.12e-5</b> | 4.24e-5          | <b>3.59e-5</b> |
| WS clust. coeff. | 45.6e-5          | <b>1.51e-5</b> | 17.3e-5          | <b>2.07e-5</b> |
| AUROC (LP)       | 0.71             | <b>0.76</b>    | 0.73             | <b>0.74</b>    |

Table 11: Ablation study of the refinement process for the IMDB dataset

|                  | Sa(GDSS)         |                | Sa(NVDiff)       |                |
|------------------|------------------|----------------|------------------|----------------|
|                  | <i>w.o. ref.</i> | <i>w. ref.</i> | <i>w.o. ref.</i> | <i>w. ref.</i> |
| MMD (gcn tr.)    | 0.592            | <b>0.419</b>   | 0.760            | <b>0.375</b>   |
| MMD (gcn untr.)  | 0.123            | <b>0.0426</b>  | 0.195            | <b>0.0329</b>  |
| WS spectral      | 0.00155763       | <b>1.68e-3</b> | 1.75e-3          | <b>1.74e-3</b> |
| WS deg. hist.    | 12.9e-5          | <b>8.56e-5</b> | 1.09e-4          | <b>1.10e-4</b> |
| WS deg. cent.    | <b>2.04e-6</b>   | <b>2.04e-6</b> | 10.2e-6          | <b>9.88e-6</b> |
| WS clos. cent.   | 4.73e-6          | <b>2.76e-6</b> | 1.33e-5          | <b>1.28e-5</b> |
| WS eigenv. cent. | <b>1.70e-5</b>   | 1.78e-5        | 3.73e-5          | <b>3.33e-5</b> |
| WS clust. coeff. | 8.14e-5          | <b>4.24e-5</b> | 5.97e-5          | <b>5.78e-5</b> |
| AUROC (LP)       | 0.758            | <b>0.814</b>   | 0.787            | <b>0.833</b>   |

Table 12: Ablation study of the refinement process for the Amazon dataset

|                         |     |      |     |     |
|-------------------------|-----|------|-----|-----|
| Hidden dimension of GNN | 16  | 64   | 128 | 256 |
| Layers in GNN           | 2   | 3    | 4   | 5   |
| Embedding size of GNN   | 16  | 32   | 64  | 128 |
| GNN aggregation type    | sum | mean |     |     |
| Hidden dimension of MLP | 8   | 16   | 64  | 128 |
| Layers in mlp           | 2   | 3    |     |     |

Table 13: Parameters and model size ranges; those ranges formed the parameter space searched during hyper-parameter optimisation.
